# Supplementary material for: Tracking Bacterial Nanocellulose in Animal Tissues by Fluorescence Microscopy
Source: MDPI journal article supplement (doi:10.3390/nano12152605), 2022-07-28
Supplement: s1 [file s1]

## Supplementary Material

### Tracking Bacterial NanoCellulose in animal tissues by fluorescence microscopy

Renato Mota 1,2, Ana Cristina Rodrigues 1,2, Ricardo Silva-Carvalho 1,2, Lúcia Costa 1,2, Daniela Martins 1,2, Paula Sampaio 3,4, Fernando Dourado 1,2 and Miguel Gama 1,2,\*

1 CEB - Centre of Biological Engineering, University of Minho, Campus de Gualtar, 4710-057 Braga, Portugal;

2 LABBELS - Associate Laboratory, 4710-057 Braga, Portugal;

3 i3S - Instituto de Investigação e Inovação em Saúde, Universidade do Porto, Rua Alfredo Allen 208, 4200-135 Porto, Portugal;

4 IBMC - Instituto de Biologia Molecular e Celular, Universidade do Porto, Rua Alfredo Allen 208, 4200-135 Porto, Portugal;

#### **\* Corresponding Author:**

Miguel Gama

fmgama@deb.uminho.pt

Department of Biological Engineering

University of Minho

Campus de Gualtar

4710-057 Braga

Portugal

## Supplementary Data

### Uptake of BCNC by BMM $\Phi$ primary cells – Electron Microscopy

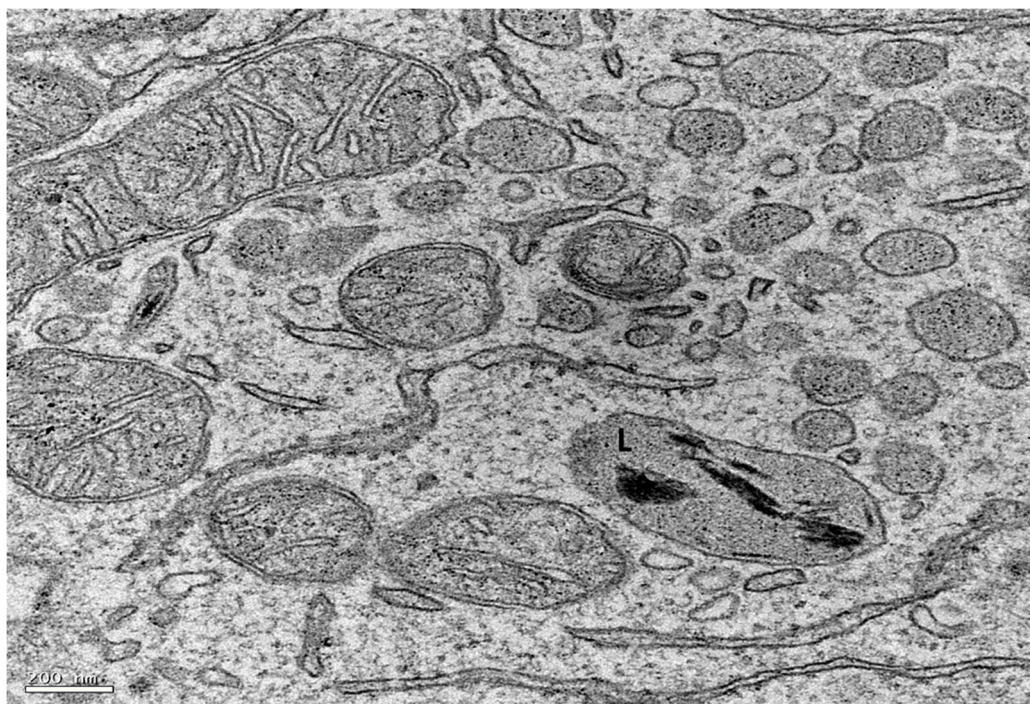

**Figure S1.** Cellular uptake of BCNC by phagocytic cells. TEM image of macrophages exposed to 0.001 mg/mL BCNC for 4h. Possible lysosome (L) containing previously phagocytized BCNC. Scale bar: 200 nm.
